# Supplementary material for: Heterogeneous N 2 O 5 reactions on atmospheric aerosols at four Chinese sites: Improving model representation of uptake parameters
Source: Copernicus journal article supplement (doi:10.5194/acp-2019-1039), 2019-12-13
Supplement: Supplementary file 1 [file acp-2019-1039-supplement.pdf]

**Heterogeneous N<sub>2</sub>O<sub>5</sub> reactions on atmospheric aerosols at four Chinese sites:  
Improving model representation of uptake parameters**

Chuan Yu<sup>1,2</sup>, Zhe Wang<sup>3</sup>, Men Xia<sup>2</sup>, Xiao Fu<sup>2</sup>, Weihao Wang<sup>2</sup>, Yee Jun Tham<sup>2,4</sup>, Tianshu Chen<sup>1</sup>, Penggang Zheng<sup>1</sup>, Hongyong Li<sup>1</sup>, Ye Shan<sup>1</sup>, Xinfeng Wang<sup>1</sup>, Likun Xue<sup>1</sup>, Yan Zhou<sup>5</sup>, Dingli Yue<sup>5</sup>, Yubo Ou<sup>5</sup>, Jian Gao<sup>6</sup>, Keding Lu<sup>7</sup>, Steven S. Brown<sup>8,9</sup>, Yuanhang Zhang<sup>7</sup>, Tao Wang<sup>2</sup>

<sup>1</sup>Environment Research Institute, Shandong University, Ji'nan, Shandong, China

<sup>2</sup>Department of Civil and Environmental Engineering, The Hong Kong Polytechnic University, Hong Kong, China

<sup>3</sup>Division of Environment and Sustainability, The Hong Kong University of Science and Technology.

<sup>4</sup>Institute for Atmospheric and Earth System Research/Physics, University of Helsinki, 00014, Helsinki, Finland

<sup>5</sup>Guangdong Environmental Monitoring Center, State Environmental Protection Key Laboratory of Regional Air Quality Monitoring, Guangzhou, China

<sup>6</sup>Chinese Research Academy of Environmental Sciences, Beijing, China

<sup>7</sup>State Key Joint Laboratory of Environmental Simulation and Pollution Control, College of Environmental Sciences and Engineering, Peking University, Beijing, China

<sup>8</sup>Chemical Sciences Division, Earth System Research Laboratory, NOAA, Boulder, CO, USA

<sup>9</sup>Department of Chemistry, University of Colorado Boulder, Boulder, CO, USA.

*Correspondence to:* Zhe Wang (z.wang@ust.hk) and Tao Wang (cetwang@polyu.edu.hk)

## **S1. Direct measurement of $\gamma_{\text{N}_2\text{O}_5}$ in polluted environments**

### **S1.1 Heshan site**

The measurement site was located on a hill (22.73° N, 112.93° E, 60 m a.s.l – above sea level), which was a semi-rural site, southwest of Heshan city in Guangdong Province (Yun et al., 2017). The site was located in the western Pearl River Delta (PRD) with lower economic activity and population density than the central PRD. Three cities of Guangzhou, Foshan and Jiangmen are located 80 km southwest, 50 km southwest and 30 km northeast of the site, respectively. The hill is covered by subtropical trees with limited residents at the foot of the hill and two highways within 3 km.

### **S1.2 Mount Tai site**

The two measurement sites were located on the top of Mount Tai (36.25° N, 117.10° E, 1465 m a.s.l.) in Shandong Province, China (Wang et al., 2017), and the measurement site in 2018 was 400 m southeast of the 2014 site. Two cities of Tai'an and Jinan (the capital of Shandong Province) are located 15 km south and 60 km north of the measurement sites, respectively. The sites are mostly affected by aged air masses and occasionally by plumes from nearby fossil fuel combustion or biomass burning. In 2014, the field campaign was conducted from 24 July to 27 August.

### **S1.3 Wangdu site**

The measurement site was a semi-rural site (38.66° N, 115.20° E) in Wangdu county of Hebei province (Tham et al., 2016). Three cities of Beijing, Tianjin and Shijiazhuang (the capital of Hebei Province) are located 170 km northeast, 180 km east and 90 km southwest of the site, respectively. The site was surrounded by agricultural lands with two highways about 1-2 km away from it and tens of thermal power stations within 200 km. The field campaign was conducted from 21 June to 9 July 2014.

### **S1.4 Mount Tai Mo Shan site**

The measurement site was on the top of Mt. Tai Mo Shan (TMS, 22.41° N, 114.12° E; 957 m a.s.l.) in Hong Kong (Wang et al., 2016). TMS is located in the southeastern PRD region and to the south of Guangdong Province. The measurement site is affected by regional air masses with limited vehicles in the TMS natural reserve. The field campaign was conducted from 15 November to 6 December 2013.

## **References**

- Tham, Y. J., Wang, Z., Li, Q., Yun, H., Wang, W., Wang, X., Xue, L., Lu, K., Ma, N., and Bohn, B.: Significant concentrations of nitryl chloride sustained in the morning: investigations of the causes and impacts on ozone production in a polluted region of northern China, *Atmospheric chemistry and physics*, 2016.
- Wang, T., Tham, Y. J., Xue, L., Li, Q., Zha, Q., Wang, Z., Poon, S. C., Dubé, W. P., Blake, D. R., and Louie, P. K.: Observations of nitryl chloride and modeling its source and effect on ozone in the planetary boundary layer of southern China, *Journal of Geophysical Research: Atmospheres*, 121, 2476-2489, 2016.
- Wang, Z., Wang, W., Tham, Y. J., Li, Q., Wang, H., Wen, L., Wang, X., and Wang, T.: Fast heterogeneous  $\text{N}_2\text{O}_5$  uptake and  $\text{ClNO}_2$  production in power plant and industrial plumes observed in the nocturnal residual layer over the North China Plain, *Atmospheric Chemistry and Physics*, 17, 12361-12378, 10.5194/acp-17-12361-2017, 2017.
- Yun, H., Wang, W., Wang, T., Xia, M., Yu, C., Wang, Z., Poon, S. C. N., Yue, D., and Zhou, Y.: Nitrate formation from heterogeneous uptake of dinitrogen pentoxide during a severe winter haze in southern China, *Atmospheric Chemistry and Physics*, 18, 17515-17527, 10.5194/acp-18-17515-2018, 2018.

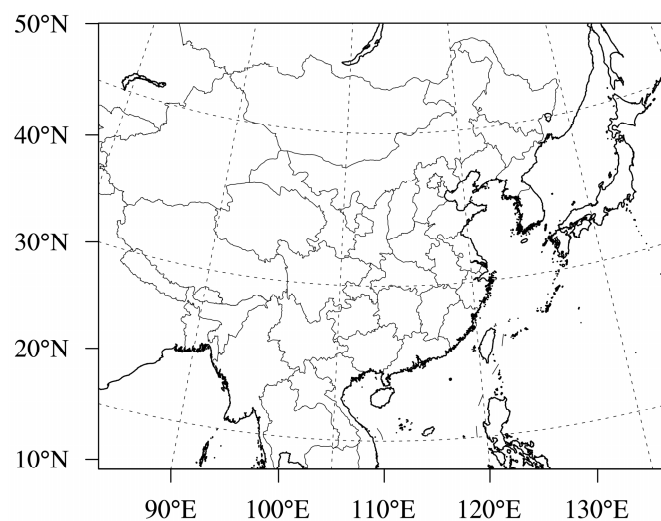

**Figure S1.** The model domain used in WRF-CMAQ simulation of  $\text{NO}_2$  and  $\text{NO}_3^-$  concentrations.

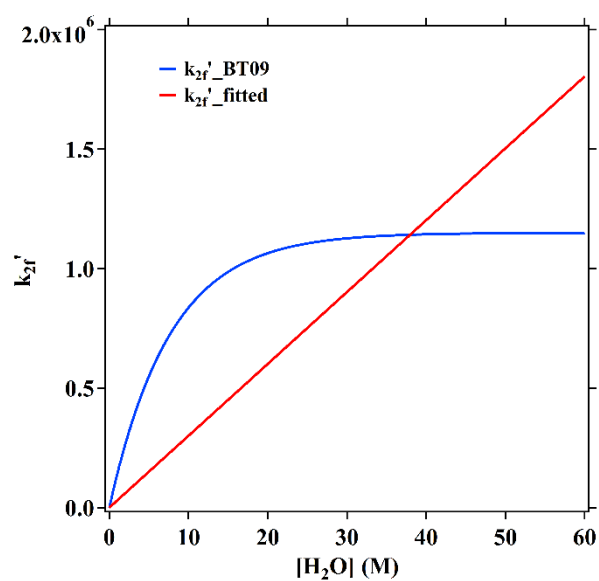

**Figure S2.** Dependence of the  $k'_2$  derived from the parameterization of BT09 (blue line) and the newly fitted parameterization (red line) on the aerosol  $\text{H}_2\text{O}$  molarity.

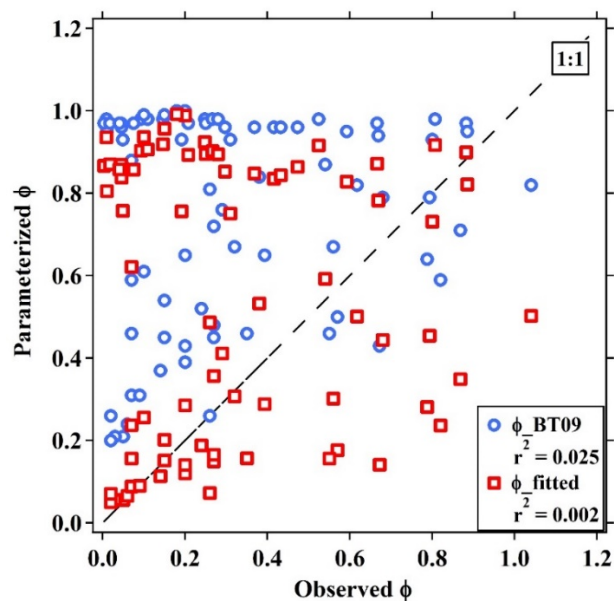

**Figure S3.** Comparison of the observed  $\Phi_{\text{CINO}_2}$  with the predictions of parameterizations. The dashed line represents the 1:1 line. Blue circles and red squares are results predicted by BT09 parameterization and the observation-based empirical parameterization, respectively.

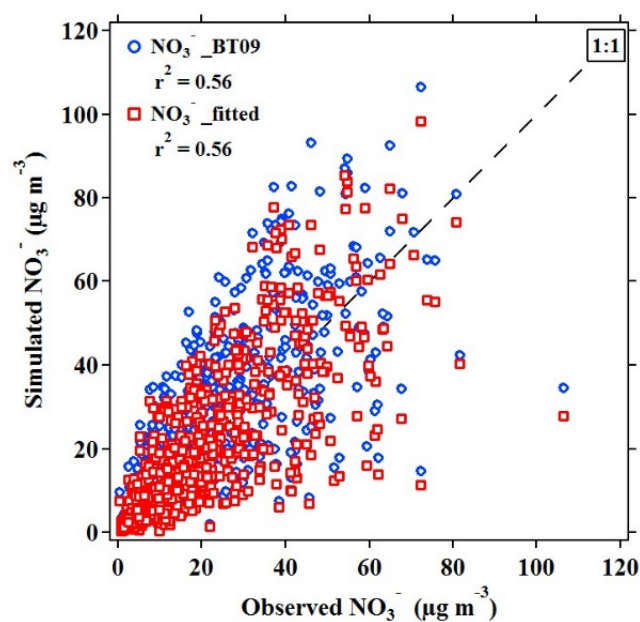

**Figure S4.** Comparison of the hourly nitrate concentrations from observation and WRF-CMAQ simulation at 29 monitoring sites in North China during December of 2017. The dashed line represents the 1:1 line. Blue circles and red squares are simulation results using BT09 parameterization and the derived observation-based empirical parameterization, respectively.

**Table S1.** Instruments used for measurement of trace gases and aerosols in Heshan and Mt Tai campaigns.

| Species                                           | Measurement technique                      | Uncertainty                        | Detection limit                | Time resolution |
|---------------------------------------------------|--------------------------------------------|------------------------------------|--------------------------------|-----------------|
| CINO <sub>2</sub> , N <sub>2</sub> O <sub>5</sub> | CIMS                                       | ± 25 %                             | 6 pptv                         | 1 min           |
| O <sub>3</sub>                                    | UV photometry                              | ± 5 %                              | 0.5 ppbv                       | 1 min           |
| NO                                                | Chemiluminescence                          | ± 20 %                             | 0.06 ppbv                      | 1 min           |
| NO <sub>2</sub>                                   | Photolytic converter and chemiluminescence | ± 20 %                             | 0.3 ppbv                       | 1 min           |
| Ionic ions of PM <sub>2.5</sub>                   | GAC-IC                                     | ± 10 %                             | 0.01-0.16 µg m <sup>-3</sup>   | 30 min          |
|                                                   | MARGA                                      | ± 25 %                             | 0.001-0.009 µg m <sup>-3</sup> | 60 min          |
| Particle size distribution                        | SMPS                                       | Particle size range 16.5 - 1000 nm |                                | 5 min           |
|                                                   | WPS                                        | Particle size range 5 nm - 10 µm   |                                | 5 min           |

**Table S2.** Statistical summary of the averaged observed N<sub>2</sub>O<sub>5</sub> uptake coefficients  $\gamma_{N_2O_5}$ , meteorological and chemical characteristics during the study periods.

| Parameter or species                               | Heshan      | Mount Tai   |
|----------------------------------------------------|-------------|-------------|
| Observed $\gamma_{N_2O_5}$                         | 0.020±0.019 | 0.011±0.005 |
| T (°C)                                             | 22.2±2.2    | 6.4±5.8     |
| RH (%)                                             | 65.5±19.1   | 61.4±25.4   |
| NO <sub>x</sub> (ppbv)                             | 14.0±11.5   | 2.2±2.1     |
| O <sub>3</sub> (ppbv)                              | 43±22       | 63±14       |
| NO <sub>x</sub> /NO <sub>y</sub>                   | 0.59±0.26   | 0.25±0.19   |
| S <sub>a</sub> (µm <sup>2</sup> cm <sup>-3</sup> ) | 1485±910    | 836±299     |
| PM <sub>2.5</sub> (µg m <sup>-3</sup> )            | 66.7±41.9   | 33.7±26.7   |
| NO <sub>3</sub> <sup>-</sup> (µg m <sup>-3</sup> ) | 10.64±11.7  | 6.67±5.40   |
| Cl <sup>-</sup> (µg m <sup>-3</sup> )              | 1.68±1.63   | 0.77±0.45   |
